# Supplementary material
Source: MDPI journal article supplement (https://www.mdpi.com/1999-4907/14/6/1274)
Supplement: s1 [file s1]

## Supplementary data

**Table S1.** Individual tree volume models for three tree species[93].

| Species        | Individual tree volume model                                    | Source                             |
|----------------|-----------------------------------------------------------------|------------------------------------|
| Korean pine    | $V_{individual} = 0.00007616D_{lum}^{1.89948264}H^{0.86116962}$ | Tree volume tables of China (2017) |
|                | $D_{lum} = -0.49805 + 0.98158D$                                 |                                    |
|                | $H = 21.331961 - 301.986783 / (D_{lum} + 14)$                   |                                    |
| Korean larch   | $V_{individual} = 0.00005228D_{lum}^{1.57561364}H^{1.36856283}$ | Tree volume tables of China (2017) |
|                | $D_{lum} = -0.34995 + 0.97838D$                                 |                                    |
|                | $H = 34.129639 - 641.807935 / (D_{lum} + 18)$                   |                                    |
| Mongolian pine | $V_{individual} = 0.00008472D_{lum}^{1.97420228}H^{0.74561762}$ | Tree volume tables of China (2017) |
|                | $D_{lum} = -0.39467 + 0.98006D$                                 |                                    |
|                | $H = 32.244561 - 956.676579 / (D_{lum} + 31)$                   |                                    |

Note:  $V_{individual}$  is individual tree volume,  $D_{lum}$  is diameter gauge,  $H$  is total tree height and  $D$  is the diameter at breast height.

**Table S2.** Allometric equations for the calculation of stand total and component biomass for each tree species [94, 95].

| Species                                             | Equation                                    | Source      |
|-----------------------------------------------------|---------------------------------------------|-------------|
| <i>Pinus koraiensis</i> Siebold & Zucc.             | $\ln(W_r) = -3.1761 + 2.1982 \times \ln(D)$ | Dong (2015) |
|                                                     | $\ln(W_s) = -2.4288 + 2.2705 \times \ln(D)$ |             |
|                                                     | $\ln(W_b) = -6.6390 + 3.2250 \times \ln(D)$ |             |
|                                                     | $\ln(W_n) = -5.2841 + 2.5952 \times \ln(D)$ |             |
| <i>Larix olgensisi</i> A. Henry                     | $\ln(W_r) = -5.3510 + 2.9914 \times \ln(D)$ | Dong (2015) |
|                                                     | $\ln(W_s) = -3.7797 + 2.8778 \times \ln(D)$ |             |
|                                                     | $\ln(W_b) = -3.7266 + 2.1147 \times \ln(D)$ |             |
|                                                     | $\ln(W_n) = -2.3186 + 1.2549 \times \ln(D)$ |             |
| <i>Pinus sylvestris</i> var. <i>mongolica</i> Litv. | $\ln(W_r) = -2.6309 + 1.9513 \times \ln(D)$ | Dong (2015) |
|                                                     | $\ln(W_s) = -3.5715 + 2.7203 \times \ln(D)$ |             |
|                                                     | $\ln(W_b) = -4.8200 + 2.5112 \times \ln(D)$ |             |
| <i>Betula platyphylla</i> Sukaczew                  | $\ln(W_n) = -3.9112 + 2.0327 \times \ln(D)$ | Dong (2015) |
|                                                     | $\ln(W_r) = -2.9527 + 2.2634 \times \ln(D)$ |             |

|                                                 |                                                |             |
|-------------------------------------------------|------------------------------------------------|-------------|
|                                                 | $\ln(W_s)=-2.3549+2.4096\times\ln(D)$          |             |
|                                                 | $\ln(W_b)=-5.7625+3.0656\times\ln(D)$          |             |
|                                                 | $\ln(W_n)=-5.9711+2.5871\times\ln(D)$          |             |
|                                                 | $\ln(W_r)=-3.0409+2.2943\times\ln(D)$          |             |
| <i>Quercus mongolica</i> Fisch. ex Ledeb.       | $\ln(W_s)=-2.5856+2.4856\times\ln(D)$          | Dong (2015) |
|                                                 | $\ln(W_b)=-6.997+3.522\times\ln(D)$            |             |
|                                                 | $\ln(W_n)=-5.146+2.3185\times\ln(D)$           |             |
|                                                 | $\ln(W_r)=-2.4058+1.9782\times\ln(D)$          |             |
| <i>Juglans mandshurica</i> Maxim                | $\ln(W_s)=-3.4542+2.7104\times\ln(D)$          | Dong (2015) |
|                                                 | $\ln(W_b)=-4.0735+2.4477\times\ln(D)$          |             |
|                                                 | $\ln(W_n)=-5.0456+2.2577\times\ln(D)$          |             |
|                                                 | $\ln(W_r)=-2.5521+1.9964\times\ln(D)$          |             |
| <i>Tilia tuan</i> Szyszyl.                      | $\ln(W_s)=-3.2077+2.6150\times\ln(D)$          | Dong (2015) |
|                                                 | $\ln(W_b)=-5.0391+2.5667\times\ln(D)$          |             |
|                                                 | $\ln(W_n)=-4.6863+1.9161\times\ln(D)$          |             |
|                                                 | $\ln(W_r)=-4.6491+2.7908\times\ln(D)$          |             |
| <i>Fraxinus mandshurica</i> Rupr.               | $\ln(W_s)=-2.8496+2.5406\times\ln(D)$          | Dong (2015) |
|                                                 | $\ln(W_b)=-5.5012+2.9299\times\ln(D)$          |             |
|                                                 | $\ln(W_n)=-5.2438+2.3450\times\ln(D)$          |             |
|                                                 | $\ln(W_r)=-2.7688+2.1452\times\ln(D)$          |             |
| <i>Ulmus pumila</i> L.                          | $\ln(W_s)=-2.6707+2.4413\times\ln(D)$          | Dong (2015) |
|                                                 | $\ln(W_b)=-3.0159+2.0328\times\ln(D)$          |             |
|                                                 | $\ln(W_n)=-3.4241+1.7038\times\ln(D)$          |             |
|                                                 | $\ln(W_r)=-3.4915+2.469\times\ln(D)$           |             |
| <i>Acer elegantulum</i> W. P. Fang & P. L. Chiu | $\ln(W_s)=-2.2812+2.3766\times\ln(D)$          | Dong (2015) |
|                                                 | $\ln(W_b)=-3.3225+2.2742\times\ln(D)$          |             |
|                                                 | $\ln(W_n)=-3.3137+1.7074\times\ln(D)$          |             |
|                                                 | $\ln(W_r)=-3.969+2.402\times\ln(D)$            |             |
| <i>Populus przewalskii</i> Maxim.               | $\ln(W_s)=-2.2319+2.345\times\ln(D)$           | Dong (2015) |
|                                                 | $\ln(W_b)=-6.7768+3.2079\times\ln(D)$          |             |
|                                                 | $\ln(W_n)=-6.4023+2.5459\times\ln(D)$          |             |
| <i>Phellodendron amurense</i> Rupr.             | $\log_{10}W_r = 1.024 + 2.617\times\log_{10}D$ | Wang (2006) |
|                                                 | $\log_{10}W_s = 2.046 + 2.168\times\log_{10}D$ |             |
|                                                 | $\log_{10}W_b = 0.455 + 2.873\times\log_{10}D$ |             |
|                                                 | $\log_{10}W_n = 0.289 + 2.479\times\log_{10}D$ |             |

All the allometric equations of the dominant species in our study were obtained from published references. Where  $W_r$ ,  $W_s$ ,  $W_b$ ,  $W_n$  are belowground, stem, branch, and needle biomass.

## Reference

93. Liu, J.; Meng, S.; Zhou, H.; Zhou, G.; Li, Y. Tree volume tables of China. *China Forestry Publishing House, Beijing (In Chinese)* **2017**, 173–180.
94. Dong, L. Developing individual and stand-level biomass equations in Northeast China forest area. *Ph.D. Thesis of Northeast Forestry University* **2015**, Harbin, P.R. China. (In Chinese with an English abstract).

95. Wang, C. Biomass allometric equations for 10 co-occurring tree species in Chinese temperate forests. *For. Ecol. Manage.* **2006**, 222, 9–16.
